# Supplementary material
Source: PubMed Central journal article supplement (PMC3092448)

## Supplementary Material For:

### PET imaging of CXCR4 using copper-64 labeled peptide antagonist

Orit Jacobson, Ido D. Weiss, Lawrence P. Szajek, Gang Niu, Ying Ma, Dale O. Kiesewetter, Joshua M. Farber and Xiaoyuan Chen

**Supplemental Fig. 1.** Biodistribution of [ $^{68}\text{Ga}$ ]T140-2D in female athymic nude mice bearing CHO and CHO-CXCR4 tumors at 2 h post-injection of the labeled peptide in the presence of different amounts of unlabeled peptide (0, 2, 5, 10 and 400  $\mu\text{g}$ ). Results shown are averages of 4-5 mice  $\pm$  SD. \* $P < 0.01$  vs. [ $^{64}\text{Cu}$ ]T140-2D alone.

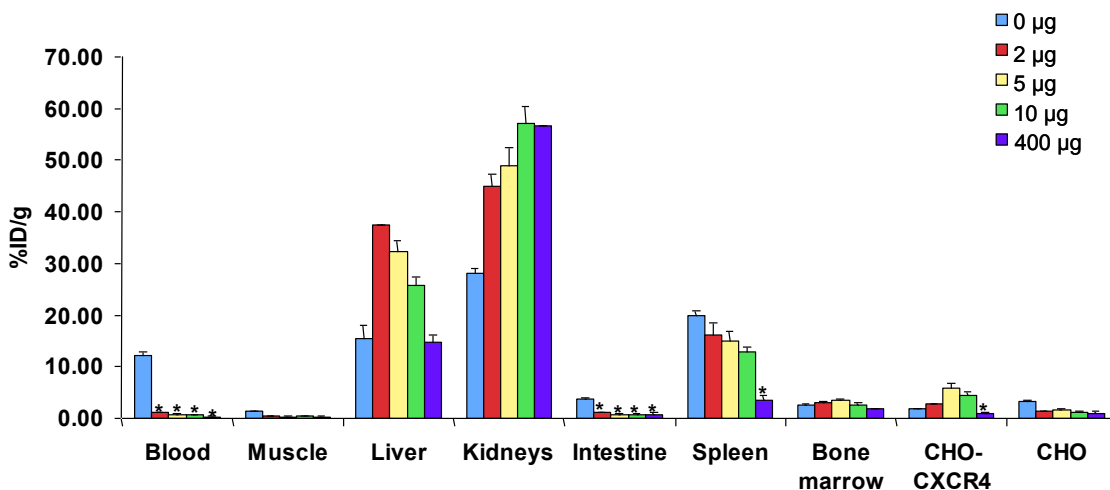

Supplement: thnov01p0251s1.pdf [file thnov01p0251s1.pdf]
